# Supplementary material for: Vanadium pentoxide 1-D nanostructures applied to dye removal from aqueous systems by coupling adsorption and visible-light photodegradation
Source: Royal Society of Chemistry journal article supplement (doi:10.1039/c4ra12788a), 2015-01-01
Supplement: c4ra12788a1.pdf [file c4ra12788a1.pdf]

## Electronic Supplementary Information

### **Vanadium pentoxide 1-D nanostructures applied to dye removal from aqueous systems by coupling adsorption and visible-light photodegradation**

Waldir Avansi Jr.<sup>1\*</sup>, Vagner R. de Mendonça<sup>1,2</sup>, Osmando F. Lopes<sup>2,3</sup>, and Caue Ribeiro<sup>3</sup>

<sup>1</sup> *Departamento de Física, Universidade Federal de São Carlos, São Carlos-SP, Brasil.*

<sup>2</sup> *Departamento de Química, Universidade Federal de São Carlos, São Carlos-SP, Brasil.*

<sup>3</sup> *Laboratório Nacional de Nanotecnologia para Agricultura (LNNA) - Embrapa Instrumentação, São Carlos-SP, Brasil.*

\*e-mail of corresponding author: w\_avansi@yahoo.com.br

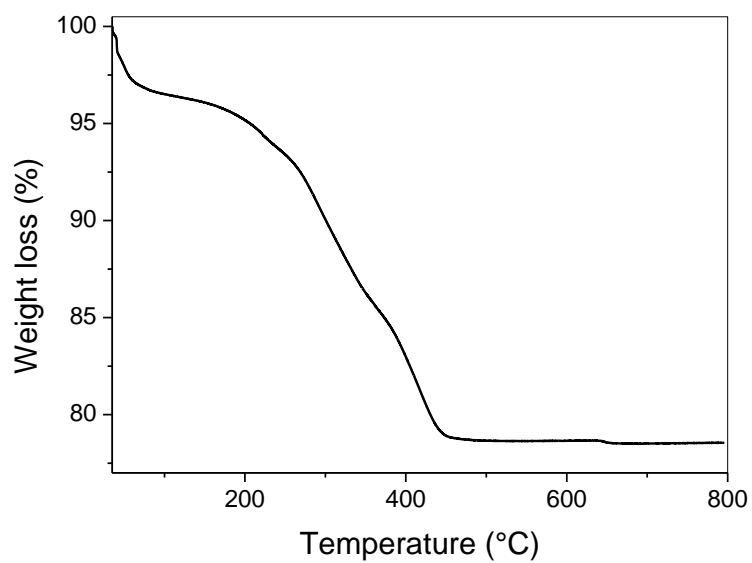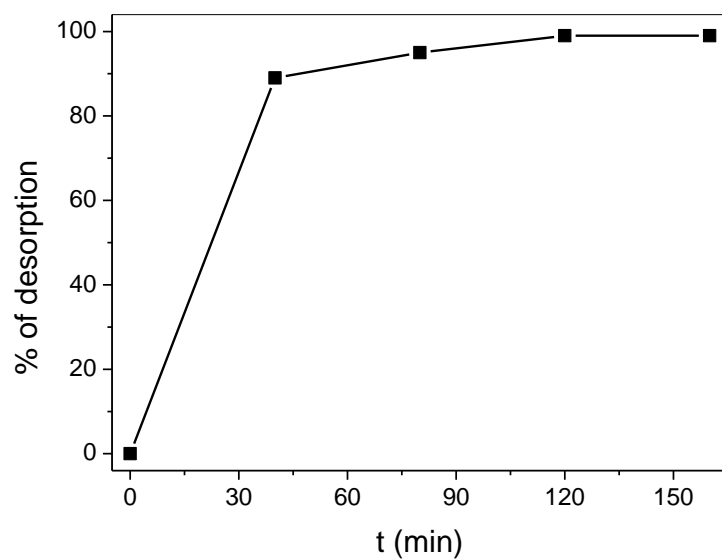

Figure S1 – a) TGA of the SAM02 with MB used to calculate the MB quantity after separation and washed by centrifugation. b) Kinetic of desorption of MB dye onto the SAM02 ( $100 \text{ mg.L}^{-1}$ ) sample in ethanol.

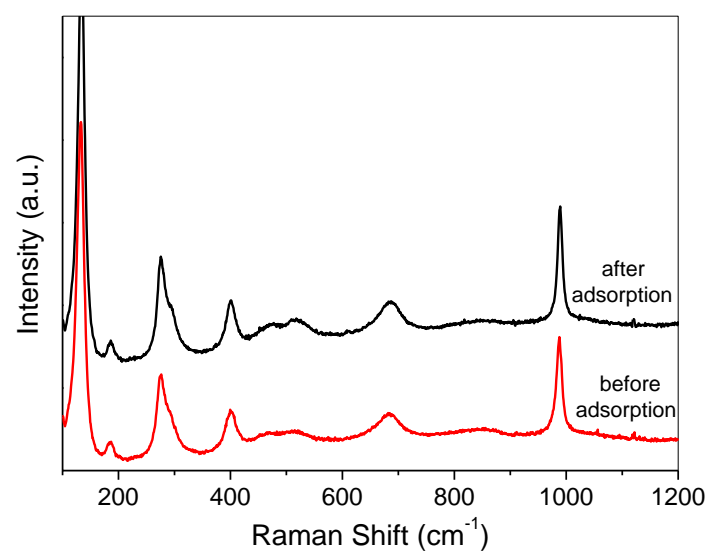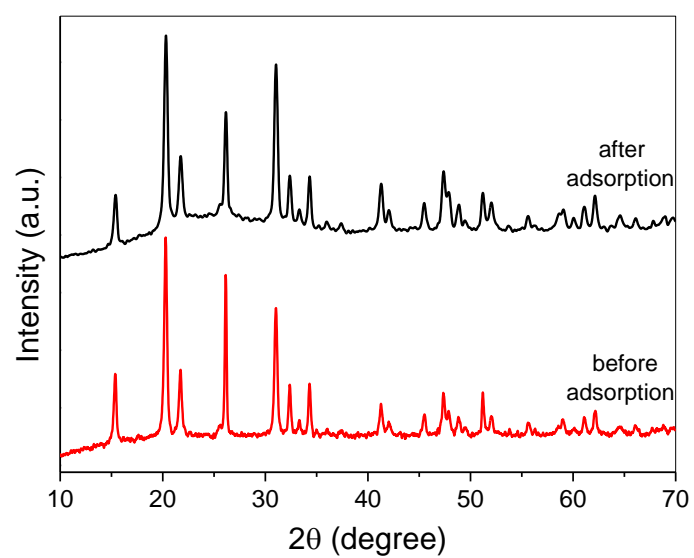

Figure S2 – Raman scattering and XRD of SAM02 sample before and after adsorption process.

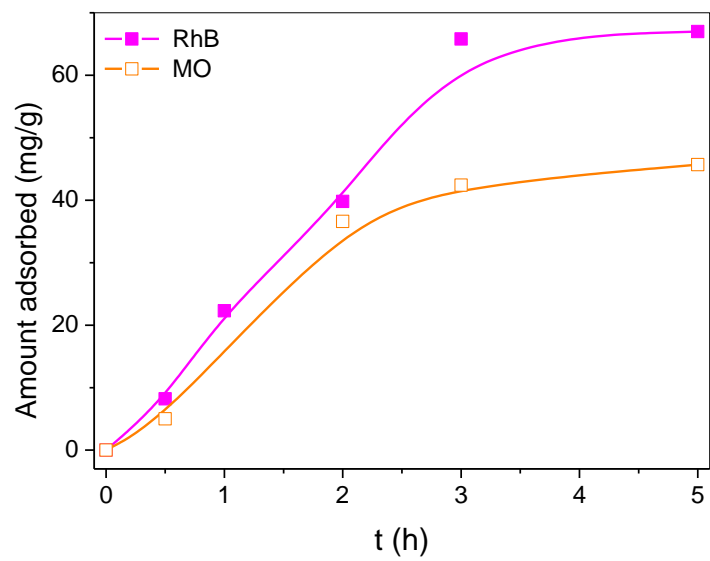

Figure S3 – The adsorption kinetic of Rhodamine B (RhB, 50 mg/L) and Methyl Orange (MO, 50 mg/L) dyes using the SAM02 sample.
